# Supplementary material for: Contextual design choices and partnerships for scaling early child development programmes
Source: PubMed Central journal article supplement — Arch Dis Child. 2019 Mar 18;104(Suppl 1):S3–S12. doi: 10.1136/archdischild-2018-315433 (PMC6557220; doi:10.1136/archdischild-2018-315433), 2019-03-18

## WEB APPENDIX

Web Appendix Table A: Saving Brains Portfolio Evaluation Data Sources

| Data Source                                                   | Description                                                                                                                                                         | Timing of data collection                                                                  | Organisation receiving data | Data type                  |
|---------------------------------------------------------------|---------------------------------------------------------------------------------------------------------------------------------------------------------------------|--------------------------------------------------------------------------------------------|-----------------------------|----------------------------|
| Service delivery forms                                        | Document completed by grantees used to collect projected, interim and/or final and quantitative information on workforce and intervention delivery                  | Yearly                                                                                     | Grand Challenges Canada     | Quantitative & Qualitative |
| Results- based Management and Accountability Framework (RMAF) | Framework completed by grantee which facilitates the collection of data and comparison of results around core metrics                                               | Six monthly                                                                                | Grand Challenges Canada     | Quantitative & Qualitative |
| RMAF+                                                         | Framework completed by grantee developed from the original RMAF and Theory of Change containing more detailed metrics on impact, process and context of innovations | Six monthly                                                                                | Grand Challenges Canada     | Quantitative & Qualitative |
| Progress reports                                              | Narrative reports completed by grantees detailing project progression, challenges, lessons learned, results, dissemination and next steps                           | Six monthly                                                                                | Grand Challenges Canada     | Qualitative                |
| Research proposals                                            | Proposal of innovation design completed by potential grantees                                                                                                       | Point of application for grant                                                             | Grand Challenges Canada     | Qualitative                |
| Saving Brains community meeting transcripts                   | Transcripts from discussions between grantees and platform members at two Saving Brains community meetings                                                          | 21 <sup>st</sup> -22 <sup>nd</sup> Jun 2016<br>25 <sup>th</sup> -26 <sup>th</sup> Oct 2016 | LSHTM                       | Qualitative                |
| Key informant interviews                                      | Key informants identified through professional networks and approached for interview on relevant themes                                                             | Jun-Oct 2016                                                                               | WHO / LSHTM                 | Qualitative                |
| Grantee interviews                                            | Grantees identified by LSHTM and platform members for thematic discussion                                                                                           | Jul-Sept 2016                                                                              | LSHTM                       | Qualitative                |
| Focus group discussions                                       | Grantees selected and invited to online focus group discussion on workforce choices, supervision and training, and monitoring quality and coverage                  | Jun-Oct 2016                                                                               | LSHTM                       | Qualitative                |

Web Appendix Table B: Key informants contributing to qualitative components of portfolio evaluation

|                                                                                                                                                                                                                                                   | Organisation Type/Name                                       | Position                        | Question theme                                                                       |
|---------------------------------------------------------------------------------------------------------------------------------------------------------------------------------------------------------------------------------------------------|--------------------------------------------------------------|---------------------------------|--------------------------------------------------------------------------------------|
| <b>ECD POLICY AND PROGRAMMING</b>                                                                                                                                                                                                                 |                                                              |                                 |                                                                                      |
| 1                                                                                                                                                                                                                                                 | Saving Brains                                                | Executive                       | ECD research, policy and programming; contemporary challenges and future directions. |
| 2.                                                                                                                                                                                                                                                | Multilateral UN organisation                                 | Policy and programming.         | ECD research, policy and programming; contemporary challenges and future directions. |
| 3.                                                                                                                                                                                                                                                | Multilateral UN organisation                                 | Policy and programming.         | ECD research, policy and programming; contemporary challenges and future directions. |
| 4.                                                                                                                                                                                                                                                | Private international ECD foundation                         | Policy maker.                   | ECD research, policy and programming; contemporary challenges and future directions. |
| 5.                                                                                                                                                                                                                                                | International Financial Institution.                         | Policy maker.                   | ECD research, policy and programming; contemporary challenges and future directions. |
| 6.                                                                                                                                                                                                                                                | Multilateral non-government organisation.                    | Policy & programming.           | ECD programming, iNGO perspective on what is needed to progress the field            |
| 7.                                                                                                                                                                                                                                                | International Child Health Research Institution              | Policy, programming & research. | ECD in global child health – challenges and future directions.                       |
| 8.                                                                                                                                                                                                                                                | Non-government disability-ECD organisation - national level. | Policy and programming.         | Inclusion in ECD programming – iNGO perspective                                      |
| 9.                                                                                                                                                                                                                                                | Ministry of Health, sub-Saharan African country.             | Policy and Programming          | ECD in global child health, health perspectives.                                     |
| <b>OTHER EXPERTS IN FIELD</b>                                                                                                                                                                                                                     |                                                              |                                 |                                                                                      |
| <b>General</b>                                                                                                                                                                                                                                    |                                                              |                                 |                                                                                      |
| 10.                                                                                                                                                                                                                                               | Public health academic institution, UK                       | Senior Researcher               | Research priorities in ECD                                                           |
| 11.                                                                                                                                                                                                                                               | Public health academic institution, USA.                     | Senior Researcher.              | Challenges, priorities and approaches in future ECD research.                        |
| <b>Specific technical</b>                                                                                                                                                                                                                         |                                                              |                                 |                                                                                      |
| 12.                                                                                                                                                                                                                                               | Public health academic institution, USA.                     | Senior Researcher.              | Impact metrics                                                                       |
| 13.                                                                                                                                                                                                                                               | Public health academic institution, USA.                     | Researcher.                     | Impact metrics                                                                       |
| 14.                                                                                                                                                                                                                                               | Public health academic institution, UK                       | Senior Researcher.              | Impact metrics                                                                       |
| 15.                                                                                                                                                                                                                                               | Multilateral UN organisation.                                | Senior Researcher.              | Impact metrics                                                                       |
| 16.                                                                                                                                                                                                                                               | Saving Brains Grant Recipient Research Institution.          | Senior Researcher.              | Implementation process metrics, human resourcing.                                    |
| 17.                                                                                                                                                                                                                                               | Saving Brains Grant Recipient Research Institution.          | Senior Researcher.              | Implementation process metrics, cost-effectiveness                                   |
| 18.                                                                                                                                                                                                                                               | Saving Brains Grant Recipient Research Institution.          | Senior Researcher.              | Integration.                                                                         |
| 19.                                                                                                                                                                                                                                               | Academic Centre, USA.                                        | Senior Researcher.              | Implementation process knowledge gaps, priority questions and research methodology.  |
| <b>Saving Brains Platform</b>                                                                                                                                                                                                                     |                                                              |                                 |                                                                                      |
| Members of the Saving Brains Platform team who were consulted about various aspects of the evaluation, their experiences working within the Saving Brains portfolio and in regard to specific technical, programming and research related themes. |                                                              |                                 |                                                                                      |
| <b>Grantees</b>                                                                                                                                                                                                                                   |                                                              |                                 |                                                                                      |
| Twenty-one of thirty-nine (54%) of research teams were specifically interviewed regarding their innovation and various aspects of their experiences within the Saving Brains portfolio.                                                           |                                                              |                                 |                                                                                      |

Web Appendix Table C: Saving Brains Seed Grants (Funding Rounds 2, 3, and 4)

| Round:<br>phase<br>of<br>funding | Project name                                                                                                                                                                                     | Institution<br>(Country)                                           | Implementation<br>countries | Trial type<br>(Control<br>group –<br>Y/N/NA) | Participants | Site       | Intervention<br>typology     |
|----------------------------------|--------------------------------------------------------------------------------------------------------------------------------------------------------------------------------------------------|--------------------------------------------------------------------|-----------------------------|----------------------------------------------|--------------|------------|------------------------------|
| 2: Seed                          | New malaria policies to protect early brain development                                                                                                                                          | University Health network (Canada)                                 | Malawi                      | Multi-centre superiority RCT (Y)             | 416          | HF         | Prevent                      |
| 2: Seed                          | Learning clubs for women's health and infant development                                                                                                                                         | RTCCD (Vietnam)                                                    | Vietnam                     | Pre and post comparison                      | 164          | HV, CG     | Promote and Prevent          |
| 2: Seed                          | Fathers Involvement: Saving Brains in Vietnam                                                                                                                                                    | Hanoi School of Public Health (Vietnam)                            | Vietnam                     | Quasi-experimental                           | 368          | HV, CG, HF | Promote                      |
| 2: Seed                          | An Integrated Toolkit to Save Newborns' Brains                                                                                                                                                   | The Hospital for Sick Children (Canada)                            | Kenya                       | Cluster RCT (Y)                              | 1819         | HV         | Promote and Prevent          |
| 2: Seed                          | A Toolkit to Minimize Pain in Infants                                                                                                                                                            | The Hospital for Sick Children (Canada)                            | Ghana                       | Intervention study (N)                       | 923          | HF         | Prevent                      |
| 2: Seed                          | Proof of Concept of a Culturally Appropriate Iron Fortified Biscuit to Reduce Maternal and Perinatal Anemia.                                                                                     | St Johns Research Institute (India)                                | India                       | Double-blind, RCT (Y)                        | 159          | HV, HF     | Prevent                      |
| 2: Seed                          | Improving Early Childhood Development in Zambia                                                                                                                                                  | Zambia Center for Applied Health Research and Development (Zambia) | Zambia                      | Community-based Cluster RCT (Y)              | 258          | HV, CG, HF | Promote                      |
| 2: Seed                          | Effect of community-based depression management and psychosocial stimulation intervention on maternal mental health and child development- A randomized controlled trial                         | ICDDR,B (Bangladesh)                                               | Bangladesh                  | Cluster RCT (Y)                              | 150          | HV         | Promote and Protect          |
| 2: Seed                          | Community-based Family Coaching for Children with Developmental Risks in Lima, Peru                                                                                                              | Socios en Salud Sucursal (Peru)                                    | Peru                        | RCT (Y)                                      | 41           | HV, CG     | Promote, Prevent and Protect |
| 2: Seed                          | CommCare ECD: Mobile Technology and Community Health Workers for Early Childhood Development                                                                                                     | Ugunja Community Resource Center (Kenya)                           | Kenya                       | RCT (Y)                                      | 1250         | HV, CG, DC | Promote                      |
| 3: Seed                          | Proving concept on a sustainable and scalable model of Early Childhood Care & Education for urban slums in Kenya                                                                                 | Kidogo Early Years (Kenya)                                         | Kenya                       | NA                                           | 155          | DC         | Promote and Protect          |
| 3: Seed                          | Novel SMS-Based Technology for Early Brain Development Support and Monitoring in Brazil                                                                                                          | TNH Digital Health (Brazil)                                        | Brazil                      | RCT (Y)                                      | 119          | HF         | Promote                      |
| 3: Seed                          | Community-based infant massage: from saving bones to saving brains                                                                                                                               | Community Empowerment Lab (India)                                  | India                       | RCT (Y)                                      | 860          | HV, CG     | Promote                      |
| 3: Seed                          | Family-inclusive Intervention to Improve Early Brain Development                                                                                                                                 | University of Ibadan (Nigeria)                                     | Nigeria                     | RCT (Y)                                      | 480          | HF         | Promote                      |
| 3: Seed                          | Fostering the development of preemies through stronger child-family well-being: innovating early child development assessment and intervention in high risk infants and their families in Brazil | UFMG (Brazil)                                                      | Brazil                      | RCT (Y)                                      | 300          | CG, HF     | Promote and Prevent          |
| 3: Seed                          | Home visiting programs to improve early childhood development and maternal mental health - evidence from the Western Region Project                                                              | Universidade de Sao Paulo (Brazil)                                 | Brazil                      | Three-arm RCT (Y)                            | 143          | HV         | Promote and Protect          |

| Round:<br>phase<br>of<br>funding | Project name                                                                                                                                                                                       | Institution<br>(Country)                      | Implementation<br>countries | Trial type<br>(Control<br>group –<br>Y/N/NA) | Participants | Site          | Intervention<br>typology     |
|----------------------------------|----------------------------------------------------------------------------------------------------------------------------------------------------------------------------------------------------|-----------------------------------------------|-----------------------------|----------------------------------------------|--------------|---------------|------------------------------|
| 3: Seed                          | Integrating a Parenting Intervention with Routine Care to Improve Early Developmental Outcomes in Children with Sickle Cell Disease and Decrease Maternal Stress                                   | The University of the West Indies (Jamaica)   | Jamaica                     | RCT (Y)                                      | 254          | HF            | Promote and Prevent          |
| 3: Seed                          | A sustainable public-private partnership for delivering integrated child development care in Pakistan                                                                                              | Association for Social Development (Pakistan) | Pakistan                    | Cluster RCT (Y)                              | 1241         | HF            | Promote and Prevent          |
| 3: Seed                          | A Community based implementation of a low cost evidence-based toolkit for improving brain development in newborns who suffered neonatal insults                                                    | University of Manitoba (Canada)               | Pakistan                    | Cluster RCT (Y)                              | 540          | HV            | Promote and Prevent          |
| 3: Seed                          | A community-based Conscious Discipline Program to Reduce Corporal Punishment in the Caribbean                                                                                                      | WINDREF (Grenada)                             | Grenada                     | Cluster RCT (Y)                              | 843          | HV            | Promote and Protect          |
| 3: Seed                          | A Mile for the Brain: Use of Social Entrepreneurship in Providing Last Mile Access of Enhanced Complementary Foods for Weaning Children in Rural Areas                                             | GIIA (Kenya)                                  | Kenya                       | NA                                           | 600          | HV, CG        | Prevent                      |
| 3: Seed                          | Maternal and Newborn Health and Early Childhood Development in Rural Low Literacy Settings of Ethiopia                                                                                             | CCFC (Canada)                                 | Ethiopia                    | RCT (Y)                                      | 2500         | HV            | Promote and Protect          |
| 3: Seed                          | Preventing Neural Tube Defects in Nicaragua through Rice Fortification                                                                                                                             | INCAP (Nicaragua)                             | Nicaragua                   | NA                                           | 154          | Other         | Prevent                      |
| 3: Seed                          | Community Youth Leaders Championing School Readiness, Transitions and Continuity                                                                                                                   | Aga Khan University (Pakistan)                | Pakistan                    | NA                                           | 215          | DC            | Promote                      |
| 4: Seed                          | Scaling early childhood development at Anganwadi Centers in India                                                                                                                                  | DMIMS (India)                                 | India                       | Cluster RCT (Y)                              | 900          | CG            | Promote and Protect          |
| 4: Seed                          | Crowdfunding and Social Networks as a Novel Mechanism to Sustainably Promote Physical Growth and Positive Psychosocial and Neurodevelopmental Outcomes in Severely Stunted Guatemalan Children     | Wuqu'Kawoq (Guatemala)                        | Guatemala                   | RCT (Y)                                      | 320          | HV            | Promote, Prevent and Protect |
| 4: Seed                          | Matuzo Bora Ya Watoto Wachanga: Good Care for Babies                                                                                                                                               | Heartland Alliance International (DRC)        | DRC                         | Intervention study                           | 121          | HV, HF        | Promote and Protect          |
| 4: Seed                          | The effects over early brain development of a nurse home visitation program for pregnant youth and their families living in a poor urban area in Sao Paulo, Brazil                                 | University of Sao Paulo (Brazil)              | Brazil                      | RCT (Y)                                      | 72           | HV, HC, Other | Promote and Protect          |
| 4: Seed                          | Strengthening Health Systems for High Risk Newborn Care: An Integrated Hospital-Community GIS System for Sustainable Delivery of Quality Care during Early Child Brain Development in Rural Uganda | Makerere University (Uganda)                  | Uganda                      | Quasi-experimental (Y)                       | 2432         | HV, HF        | Prevent                      |
| 4: Seed                          | First Steps (Intera za Mbere): Promoting healthy early childhood development by extending holistic parenting education nation-wide through radio-facilitated peer                                  | Save the Children (Rwanda)                    | Rwanda                      | RCT (Y)                                      | 1620         | HV, CG        | Promote                      |

| Round:<br>phase<br>of<br>funding | Project name                                                                                                                                | Institution<br>(Country)                                                                            | Implementation<br>countries | Trial type<br>(Control<br>group –<br>Y/N/NA) | Participants | Site   | Intervention<br>typology |
|----------------------------------|---------------------------------------------------------------------------------------------------------------------------------------------|-----------------------------------------------------------------------------------------------------|-----------------------------|----------------------------------------------|--------------|--------|--------------------------|
|                                  | learning groups, and by increasing access to emergent literacy materials.                                                                   |                                                                                                     |                             |                                              |              |        |                          |
| 4: Seed                          | A community-based model of delivery of Kangaroo Mother Care for improving child survival and brain development in Low Birth Weight newborns | Society for Applied Studies (India)                                                                 | India                       | NA                                           | 450          | HV     | Promote and Prevent      |
| 4: Seed                          | Steps Brain Booster Program                                                                                                                 | Steps Baby Lounge (Brazil)                                                                          | Brazil                      | RCT (Y)                                      | 110          | DC     | Promote                  |
| 4: Seed                          | Integrating early child development in home-based environmental interventions in rural Peru                                                 | Universidad Peruana Cayetano Heredia (Peru), Swiss Tropical & Public Health Institute (Switzerland) | Peru                        | RCT (Y)                                      | 162          | HV, CG | Promote and Prevent      |
| 4: Seed                          | Chamas for Change: Building Adult Capabilities to Safeguard Children's Developmental Potential through Mother-Child Clubs in Kenya          | Moi University (Kenya), AMPATH (Canada), University of Toronto (Canada)                             | Kenya                       | Prospective cohort with matched control (Y)  | 613          | CG     | Promote                  |

## Web Appendix Textbox A: Methods of Saving Brains portfolio impact and process evaluation

### Textbox A: Methods of Saving Brains portfolio impact and process evaluation

We undertook an impact and process evaluation of child development projects funded by Saving Brains, Grand Challenges Canada (GCC) between 2011 and 2016.

#### Conceptual Evaluation framework (Figure a)

To guide evaluation design, a Conceptual Evaluation Framework was developed. (Figure a) This used key structural elements of the Saving Brains Portfolio monitoring and evaluation framework specifically an existing Portfolio level Theory of Change (ToC) and related indicators which had been developed by a diverse team of ECD experts coordinated by the Saving Brains partnership (Web Appendix Figure A) The evaluation framework provided a structure for considering processes by which outputs, outcomes and impact were expected to be achieved across Saving Brains Seed and TTS projects.

For evaluation purposes, projects were also described by type, according to the focus of their intervention (i.e. 'promote', 'protect' and/or 'prevent'). These terms, defined below, map to domains within the WHO NCF as illustrated in Figure 1.

Figure a Portfolio Conceptual Evaluation Framework

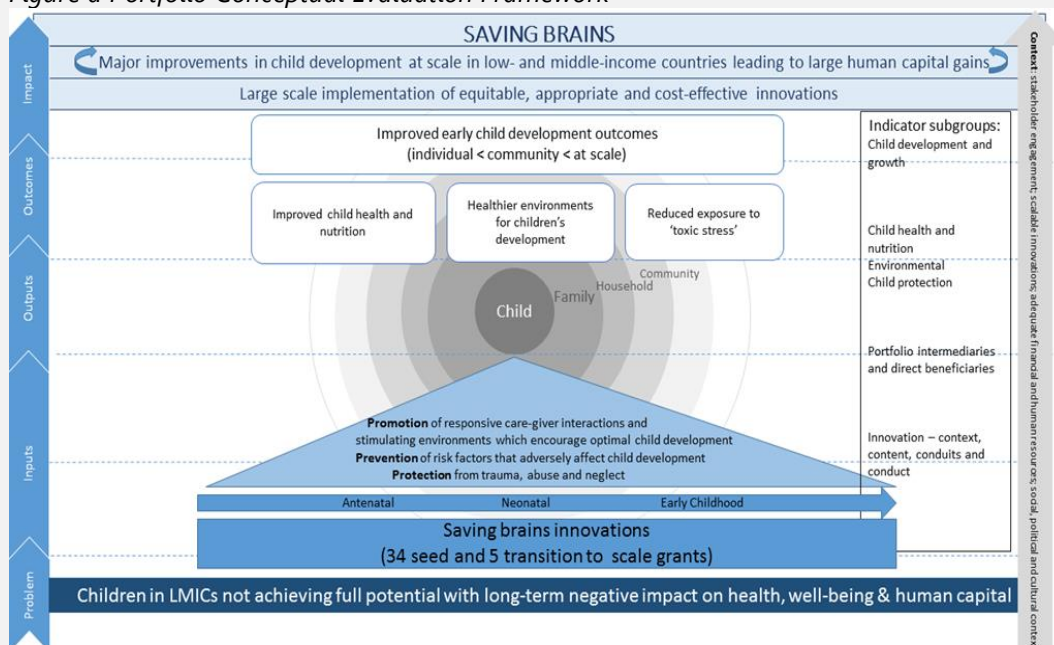

Since the majority of projects in the portfolio focused on responsive stimulation or early learning, this comprised the main focus on the evaluation.

#### Data sources and collection

A wide range of data sources were used for both quantitative and qualitative components of the evaluation (Web appendix Table A).

#### Quantitative

Project teams collected quantitative impact and process data using pre-specified data collection tools provided by Grand Challenges Canada, in particular;

- Service Delivery Forms (SDFs): Microsoft Word documents with tables comprising data on contact point, cadre types, remuneration, supervision and training of workers, logistics of intervention delivery, including duration and frequency of contact time with participants, and who received the intervention and white space boxes for information on fidelity and quality of interventions.
- Results-based Management and Accountability Framework (RMAF): Microsoft Excel document comprising data on numbers of recipients and beneficiaries (intermediary and final) of interventions; child growth and development outcomes; intermediary outcomes (including parental and home environment outcomes); resource availability, funds leveraged and costing; service provider recruitment, training and supervision; community reach, coverage and demand for intervention; and social, biological and policy context.

## **Textbox A (continued): Methods of Saving Brains portfolio impact and process evaluation**

### **Qualitative**

#### *Thematic areas of enquiry*

Broad thematic areas of enquiry, relevant to ECD policy and programming at scale, were established based on literature review, stakeholder consultation and analysis of written portfolio documents (Web Appendix Table A).

Pragmatic literature review included a search through Medline and Embase, using the following Medical Subject Heading terms; 'Child development' OR 'Developmental Disabilities' AND 'Developing Countries'. Additional articles were retrieved through reference lists of identified articles and Saving Brains materials. Grey literature was searched through websites of major multilateral organisations engaged in ECD programming including the World Health Organisation, UNICEF, Save the Children Fund, the World Bank, World Vision International, other related organisations, and Google.

The following thematic areas of enquiry were established for further exploration; partnerships, content and adaptation of intervention, universal/targeted approaches, delivery strategies, contact points, workforce (recruitment, training, supervision and incentivisation), integration with other sectors, use of technology, processes for monitoring impact, quality, coverage and cost, challenges and strategies for resolution.

#### *Interviews, meetings and focus group discussions*

Key informants were purposively selected with snowballing from professional networks including national and international programmers, policy makers, ECD researchers, Saving Brains project leads and members of the Saving Brains Platform (Web appendix Table B). All project leads were invited to focus group discussions (FGD) and/or interview via email. FGD participants were exclusively project leads. Interview participants were key informants and project leads. FGD and in-depth interviews with key informants were conducted both online via Skype and face-to-face at Saving Brains meetings.

Interviewers and FGD facilitators were members of the LSHTM evaluation team and members of the wider Saving Brains partnership. Interviews and FGDs were directed by 'topic guides' developed according to emergent thematic areas of enquiry. Audio recordings of FGDs, interviews and meetings were transcribed by a third party.

#### *Written documents*

Research proposals and progress reports included qualitative data on project design, context of intervention delivery and in-depth information on challenges, lessons learned and next steps for innovation teams (Web Appendix Table A). These written documents were submitted by innovation leads to GCC in Microsoft Word or PDF format.

### **Data analysis**

#### *Quantitative*

Quantitative data were entered manually or automatically imported into Microsoft Excel for data cleaning and management. Data analysis, using Stata v14, included basic statistical methods including mode, mean, median, ranges and interquartile ranges of frequencies, percentages and ratios for a range of variables across the three areas of interest (contact point, cadre and content).

#### *Qualitative*

Project documents and meeting, interview and FGD transcripts were imported into NVivo11 and data were coded independently by two members of the LSHTM evaluation team (KM and MKL). An inductive approach was used to create an evolving coding framework, and data was abstracted relevant to initial and emergent themes, until saturation was reached. Thematic content analysis was undertaken on review of NVivo11 node contents and coding summary reports.

Web Appendix Figure A: Saving Brains Portfolio level Theory of Change

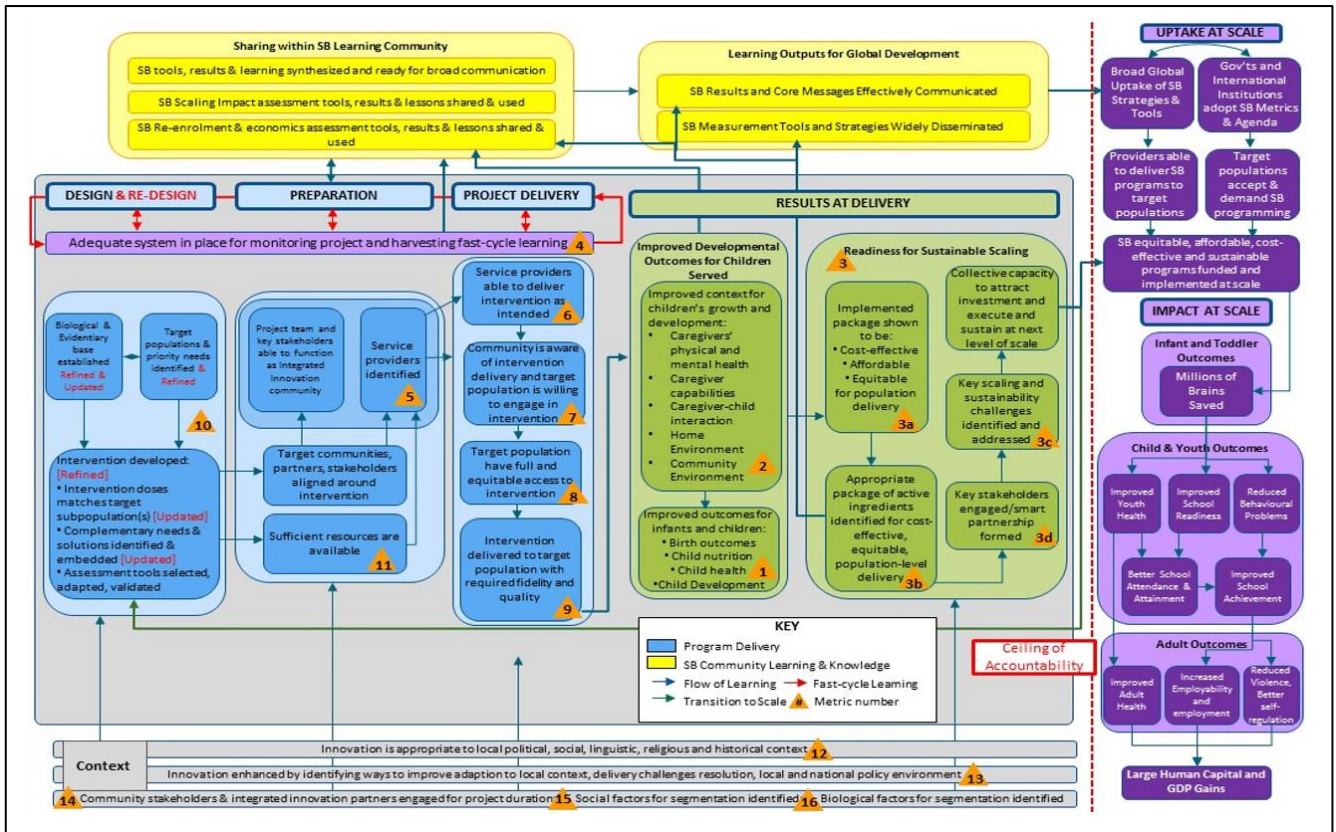

Supplement: archdischild-2018-315433supp001.pdf [file archdischild-2018-315433supp001.pdf]
